# Supplementary material for: Evaluation of simulated N cycling using observations from a 15 N tracer experiment in a mixed deciduous forest
Source: Copernicus journal article supplement (doi:10.5194/egusphere-2025-5876), 2025-12-04
Supplement: Supplementary file 1 [file egusphere-2025-5876-supplement.pdf]

**Table S1.** The turnover rates (in years) of vegetation and soil pools in the QUINCY model.

| Pool               | Turnover rate (year) |
|--------------------|----------------------|
| Leaf               | 0.5                  |
| Fine roots         | 0.7                  |
| Coarse roots       | 8.0                  |
| Sapwood            | 40.0                 |
| Fruits             | 1.0                  |
| Litter: soluble    | 0.08                 |
| Litter: structural | 0.1                  |
| Soil: fast pool    | 2.0                  |
| Soil: slow pool    | 100.0                |

**Table S2.** Soil organic matter carbon (C) and nitrogen (N) at different soil depths, down to 50 cm. Observations (in bold) and simulated carbon and nitrogen pools. The simulated values are 30 year averages.

| Storage | C (gCm <sup>-2</sup> ) | N (gNm <sup>-2</sup> ) | C:N            | obs depth (cm) |
|---------|------------------------|------------------------|----------------|----------------|
| L1      | <b>3078</b> 3407       | <b>205</b> 379         | <b>15</b> 8.9  | 0-10           |
| L2      | - 2913                 | - 330                  | - 9.4          | -              |
| L3      | <b>2049</b> 2428       | <b>169</b> 275         | <b>12</b> 8.8  | 10-20          |
| L4      | <b>983</b> 2142        | <b>113</b> 242         | <b>8.7</b> 8.9 | 20-30          |
| L5      | <b>571</b> 2214        | <b>87</b> 247          | <b>6.6</b> 9.0 | 30-40          |
| L6      | <b>304</b> 1602        | <b>63</b> 178          | <b>4.8</b> 9.0 | 40-50          |

**Table S3.** The initial  $\delta^{15}\text{N}$  of the simulations and observations. The  $\delta^{15}\text{N}$  of the observed wood pool was derived from observations of bark and new wood, as no measurements of old wood before labelling were available.

| Pool         | Observed $\delta^{15}\text{N}$ | Simulated $\delta^{15}\text{N}$ |
|--------------|--------------------------------|---------------------------------|
| Leaf         | -2.1                           | -2.3                            |
| Fine roots   | -1.6                           | -2.0                            |
| Coarse roots | -2.4                           | -1.4                            |
| Wood         | -1.2                           | -1.1                            |
| Litter       | 0.4                            | -1.7                            |
| SOM 0-10 cm  | 2.9                            | -1.4                            |
| SOM 10-50 cm | 4.9                            | -0.4                            |
